# Supplementary material for: Synthesis, characterization and optical studies on lanthanide-doped CdS quantum dots: new insights on CdS → lanthanide energy transfer mechanisms
Source: Royal Society of Chemistry journal article supplement (doi:10.1039/c0jm03188g), 2010-11-23
Supplement: c0jm03188g.pdf [file c0jm03188g.pdf]

## Supporting information

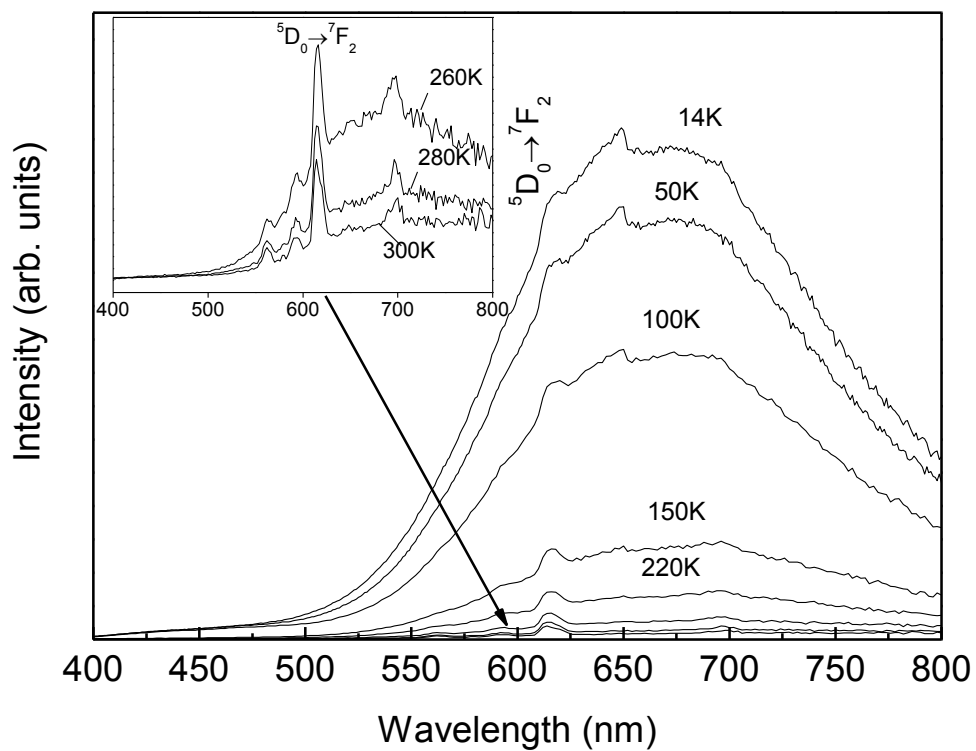

**Figure S1.** Emission spectra of the Eu<sup>3+</sup>-doped CdS NCs excited at 280 nm in the temperature interval 14-300 K. For a better visualization, the inset shows a magnification of the 260, 280 and 300K spectra.
